# Supplementary material
Source: PubMed Central journal article supplement (PMC4294475)
Supplement: supp_M114.622480_jbc.M114.622480-1.pdf [file supp_M114.622480_jbc.M114.622480-1.pdf]

## SUPPLEMENTAL INFORMATION

Domain interactions control complex formation and polymerase specificity in the biosynthesis of the *Escherichia coli* O9a antigen

**Sean D. Liston, Bradley R. Clarke, Laura K. Greenfield, Michelle R. Richards, Todd L. Lowary, and Chris Whitfield\***

\*To whom correspondence may be addressed: Department of Molecular and Cellular Biology, Science Complex, University of Guelph, Guelph, Ontario N1G 2W1, Canada. Tel.: 519-824-4120 (ext. 53361); Fax: 519-837-3273; E-mail: cwhitfie@uoguelph.ca.

**Table S1. Sequences of oligonucleotide primers used to generate site-directed mutants and recombinant plasmids.**

| Plasmid | Primer       | Sequence <sup>a,b,c</sup> (5'→3')                                      | Features                                                                                                                  |
|---------|--------------|------------------------------------------------------------------------|---------------------------------------------------------------------------------------------------------------------------|
| pWQ766  | LG33         | gatgaattcaccatgcatcatcatcatcatc<br>atcatcatCATATTTTGATTGATGT<br>CCAGGG | Forward primer for the amplification of His <sub>10</sub> - <i>wbdA</i> <sup>1-1305</sup> ; <i>EcoRI</i> restriction site |
|         | LG34         | gatcaagcttttaTTCGCTCAGCGCAT<br>CGATTTTCTGC                             | Reverse primer for the amplification of <i>wbdA</i> <sup>1-1305</sup> ; <i>HindIII</i> restriction site                   |
| pWQ769  | WbdAE317AFwd | GTGTTCCCGTCGCTGCATGCA<br>GGTTTCGGCC                                    | Forward primer used to generate E317A mutation in His <sub>10</sub> -WbdA                                                 |
|         | WbdAE317AFwd | GCGGCAGGCCGAAACCTGCA<br>TGCAGCGACG                                     | Reverse primer used to generate E317A mutation in His <sub>10</sub> -WbdA                                                 |
| pWQ770  | SL001        | CAACTTTCATCTGGGATAACT<br><u>CGAGGATGCCAGCGTACCG</u>                    | Forward primer used to introduce non-sense mutation and <i>XhoI</i> restriction site in <i>wbdA</i> after codon 635.      |
|         | SL002        | CGGTACGCTGGCATCCTCGA<br><u>GTTATCCCAGATGAAAGTTG</u>                    | Reverse primer used to introduce non-sense mutation and <i>XhoI</i> restriction site in <i>wbdA</i> after codon 635.      |
| pWQ771  | SL005        | GTGGTGCATGATATTTAACTC<br><u>GAGCGCCGTCGGAGTGG</u>                      | Forward primer used to introduce non-sense mutation and <i>XhoI</i> restriction site in <i>wbdA</i> after codon 568.      |
|         | SL006        | CCACTCCGGACGGCGCTCGA<br><u>GTAAATATCATGCACCAC</u>                      | Reverse primer used to introduce non-sense mutation and <i>XhoI</i> restriction site in <i>wbdA</i> after codon 568.      |
| pWQ772  | SL071        | CATCTCTTCCCGGAGCTGTAA<br><u>CTCGAGATTGACAGCATGCG</u><br>CGCC           | Forward primer used to introduce non-sense mutation and <i>XhoI</i> restriction site in <i>wbdA</i> after codon 547.      |
|         | SL072        | GGCGCGCATGCTGTCAATCTC<br><u>GAGTTACAGCTCCGGGAAGA</u><br>GATG           | Reverse primer used to introduce non-sense mutation and <i>XhoI</i> restriction site in <i>wbdA</i> after codon 547.      |
| pWQ773  | SL069        | GGTGCTGACGAACCGGTGTA<br><u>ACTCGAGAGACGATGTGCTT</u><br>ATTGCC          | Forward primer used to introduce non-sense mutation and <i>XhoI</i> restriction site in <i>wbdA</i> after codon 526.      |
|         | SL070        | GGCAATAAGCACATCGTCTCT<br><u>CGAGTTACACCGTTCGTCA</u><br>GCACC           | Reverse primer used to introduce non-sense mutation and <i>XhoI</i> site in <i>wbdA</i> after codon 526.                  |
| pWQ774  | SL003        | CTACTACACCCTGGCTAACTC<br><u>GAGCGCTACGCCAACC</u>                       | Forward primer used to introduce non-sense mutation and <i>XhoI</i> restriction site in <i>wbdA</i> after codon 502.      |

|        |       |                                             |                                                                                                                                    |
|--------|-------|---------------------------------------------|------------------------------------------------------------------------------------------------------------------------------------|
|        | SL004 | GGTTGGCGTAGCGCTCGAGT<br>TAGCCAGGGGTGTAGTAG  | Reverse primer used to introduce non-sense mutation and <i>Xho</i> I restriction site in <i>wbdA</i> after codon 502.              |
| pWQ775 | SL012 | gatctctagagATGCATATTTTGATT<br>GATGTCCAGGG   | Forward primer used for the amplification of <i>wbdA</i> <sup>1-1905</sup> and cloning into pUT18C; <i>Xba</i> I restriction site  |
|        | SL022 | gatcgaattcttaTCCCAGATGAAAG<br>TTGCTG        | Reverse primer for the amplification of <i>wbdA</i> <sup>1-1905</sup> and cloning into pUT18C; <i>Eco</i> RI restriction site      |
| pWQ776 | SL012 | gatctctagagATGCATATTTTGATT<br>GATGTCCAGGG   | Forward primer for the amplification of <i>wbdA</i> <sup>1-1704</sup> and cloning into pUT18C; <i>Xba</i> I restriction site       |
|        | SL015 | gatctctagaccAATATCATGCACC<br>ACGAAG         | Reverse primer for the amplification of <i>wbdA</i> <sup>1-1704</sup> and cloning into pUT18C; <i>Eco</i> RI restriction site      |
| pWQ777 | SL012 | gatctctagagATGCATATTTTGATT<br>GATGTCCAGGG   | Forward primer for the amplification of <i>wbdA</i> <sup>1-1641</sup> and cloning into pUT18C; <i>Xba</i> I restriction site       |
|        | SL075 | gatcgaattcttaCAGCTCCGGGAAG<br>AGATG         | Reverse primer used for the amplification of <i>wbdA</i> <sup>1-1641</sup> and cloning into pUT18C; <i>Eco</i> RI restriction site |
| pWQ778 | SL012 | gatctctagagATGCATATTTTGATT<br>GATGTCCAGGG   | Forward primer for the amplification of <i>wbdA</i> <sup>1-1578</sup> and cloning into pUT18C; <i>Xba</i> I restriction site       |
|        | SL073 | gatcgaattcttaCACCGGTTTCGTCA<br>GCACC        | Reverse primer for the amplification of <i>wbdA</i> <sup>1-1578</sup> and cloning into pUT18C; <i>Eco</i> RI restriction site      |
| pWQ779 | SL012 | gatctctagagATGCATATTTTGATT<br>GATGTCCAGGG   | Forward primer for the amplification of <i>wbdA</i> <sup>1-1506</sup> and cloning into pUT18C; <i>Xba</i> I restriction site       |
|        | SL016 | gatctctagaccGCCAGGGGTGTAG<br>TAGACGG        | Reverse primer for the amplification of <i>wbdA</i> <sup>1-1506</sup> and cloning into pUT18C; <i>Eco</i> RI restriction site      |
| pWQ780 | LG79  | gatcgatctagagATGCATATTTTGA<br>TTGATGTCCAGGG | Forward primer for the amplification of <i>wbdA</i> <sup>1-1305</sup> and cloning into pUT18C; <i>Xba</i> I restriction site       |

---

|        |       |                                                    |                                                                                                                                |
|--------|-------|----------------------------------------------------|--------------------------------------------------------------------------------------------------------------------------------|
|        | LG80  | <u>gatcgaattctta</u> TTCGCTCAGCGCAT<br>CGATTTTCTGC | Reverse primer for the amplification of <i>wbdA</i> <sup>1-1305</sup> and cloning into pUT18C <i>EcoRI</i> restriction site    |
| pWQ781 | LG81  | <u>gatcgatctagag</u> ATGCAGAAAATC<br>GATGCGCTGAGCG | Forward primer for the amplification of <i>wbdA</i> <sup>1279-2520</sup> and cloning into pUT18; <i>XbaI</i> restriction site  |
|        | SL014 | <u>gatcgaattcga</u> TTGCTTCGCGGCTG<br>GCGCG        | Reverse primer for the amplification of <i>wbdA</i> <sup>1279-2520</sup> and cloning into pUT18; <i>EcoRI</i> restriction site |

---

<sup>a</sup>Restriction sites are underlined.

<sup>b</sup>Non-chromosomal sequences are lowercase.

<sup>c</sup>Point mutations are bolded.
